# Supplementary material for: Enhanced Evaluation of Sub-daily and Daily Extreme Precipitation in Norway from Convection-Permitting Models at Regional and Local Scales
Source: Copernicus journal article supplement (doi:10.5194/hess-2024-68), 2024-03-05
Supplement: Supplementary file 1 [file hess-2024-68-supplement.pdf]

## Supporting Information

# Enhanced Evaluation of Sub-daily and Daily Extreme Precipitation in Norway from Convection-Permitting Models at Regional and Local Scales

Authors: Kun Xie<sup>1,2</sup>, Lu Li<sup>3</sup>, Hua Chen<sup>1,2</sup>, Stephanie Mayer<sup>3</sup>, Andreas Dobler<sup>4</sup>, Chong-Yu Xu<sup>5</sup>, Ozan Mert Gokturk<sup>3</sup>

<sup>1</sup>State Key Laboratory of Water Resources and Hydropower Engineering Science, Wuhan University, Wuhan 430072, P. R. China

<sup>2</sup>Hubei Provincial Key Lab of Water System Science for Sponge City Construction, Wuhan University, Wuhan, China

<sup>3</sup>NORCE Norwegian Research Centre, Bjerknes Centre for Climate Research, Bergen, Norway

<sup>4</sup>The Norwegian Meteorological Institute, Oslo, Norway

<sup>5</sup>Department of Geosciences, University of Oslo, P.O Box 1047 Blindern, 0316 Oslo, Norway

*Correspondence to:* Hua Chen ([chua@whu.edu.cn](mailto:chua@whu.edu.cn)); Lu Li ([luli@norceresearch.no](mailto:luli@norceresearch.no))

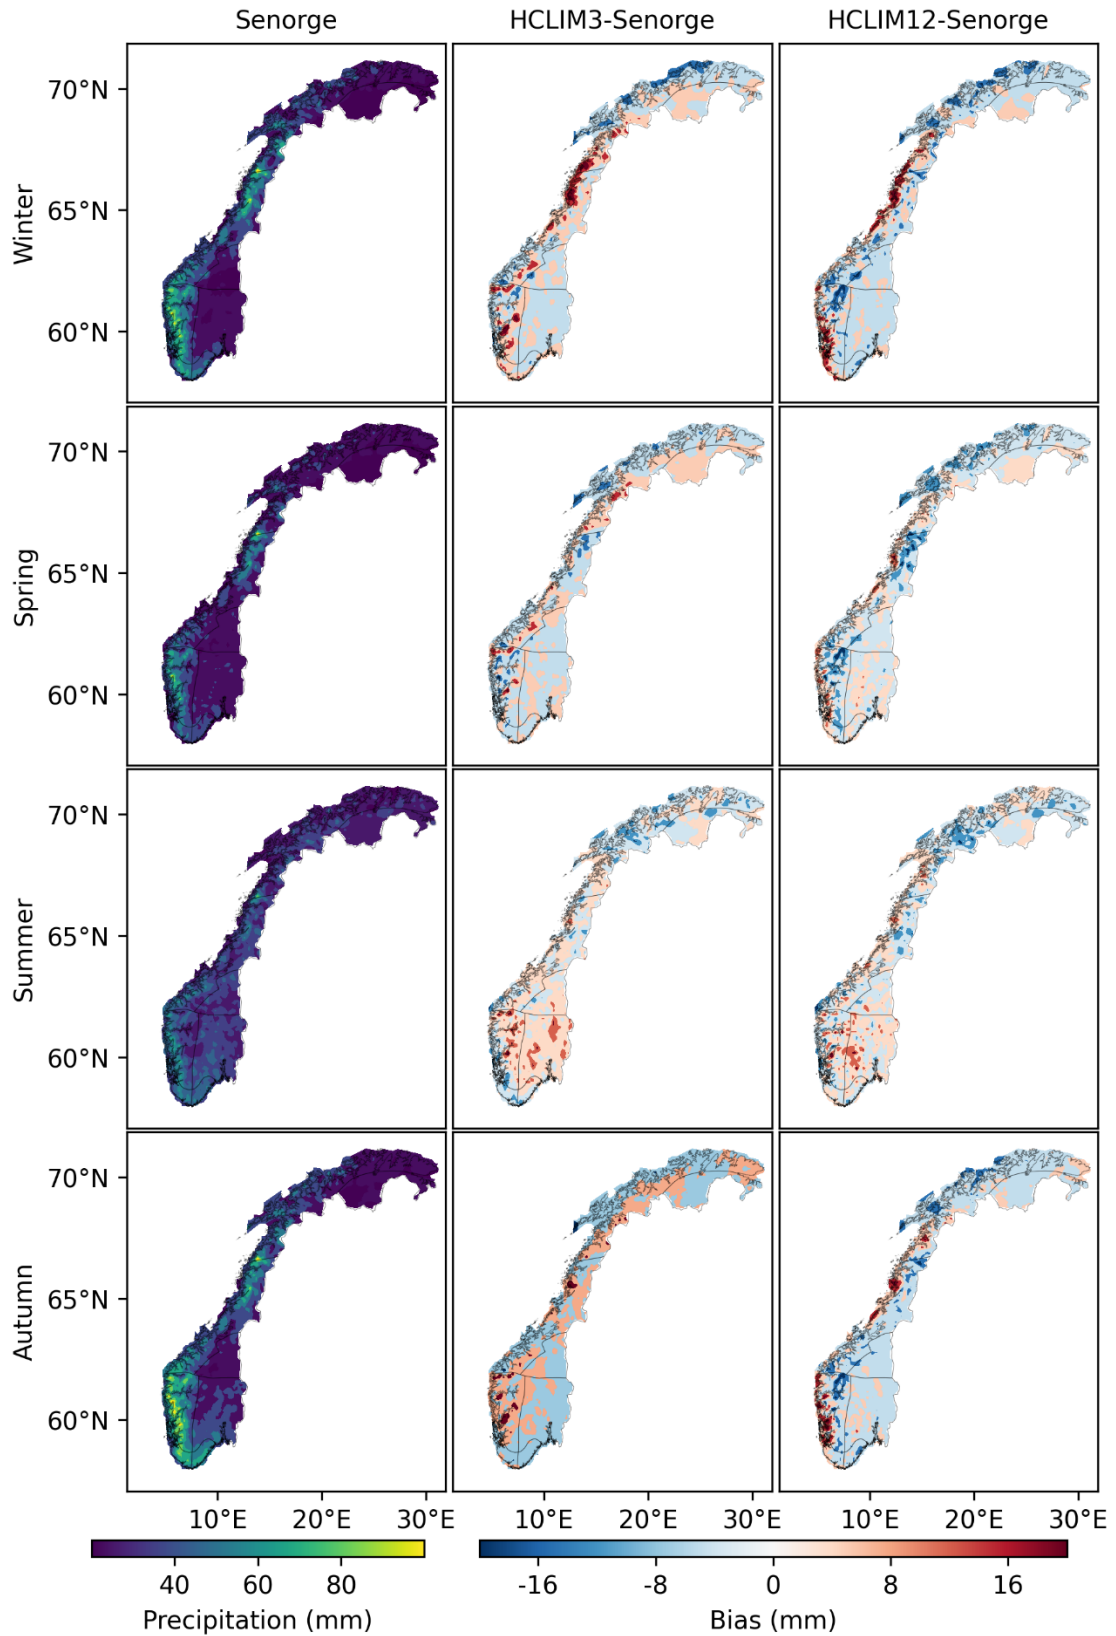

Figure S1. Spatial distribution of seasonal maximum 1-day precipitation ( $Rx1d$ ) from SeNorge and its bias with simulations (HCLIM3 and HCLIM12) during 1999-2018.

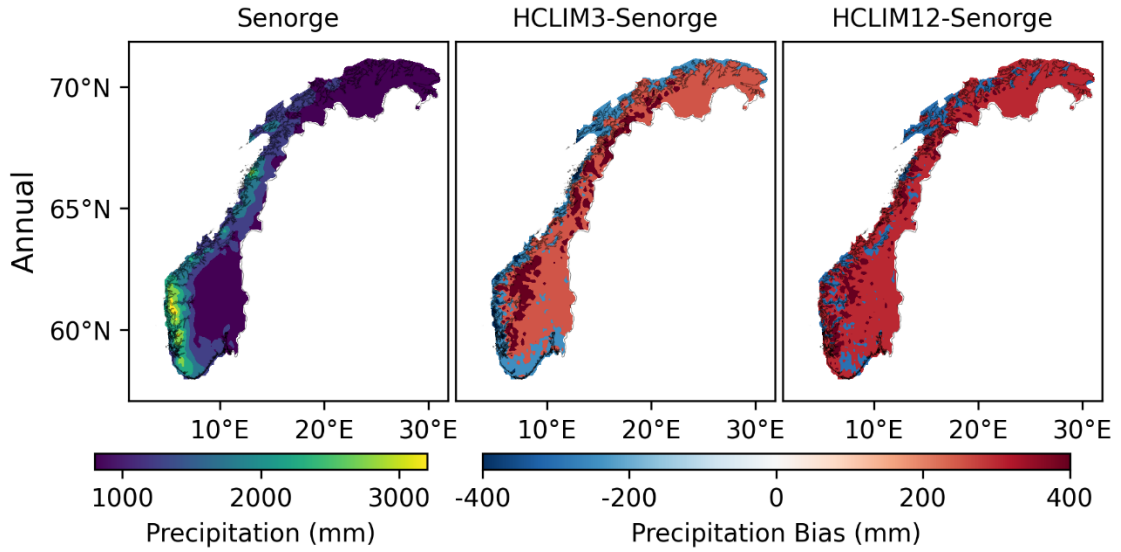

Figure S2. Spatial distribution of annual precipitation from SeNorge and its bias with simulations (HCLIM3 and HCLIM12) during 1999-2018.

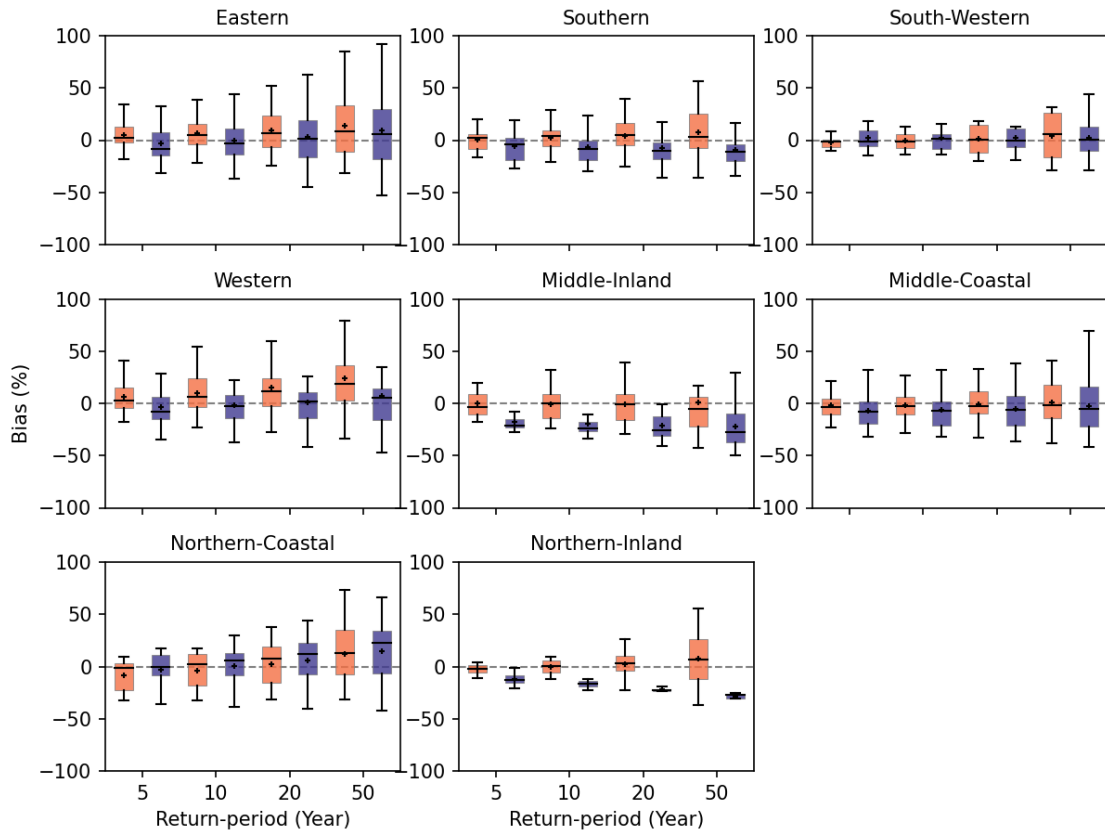

Figure S3. Bias of return-levels in the present-day for HCLIM3 and HCLIM12 relative to observation for 5-, 10-, 20-, and 50-year return periods in the 192 daily rain-gauges. Return periods of 5-, 10-, 20-, and 50-year are calculated on the basis of station-scale GEV. The bias of return-levels for 192-rain-gauges are statistics by regions.

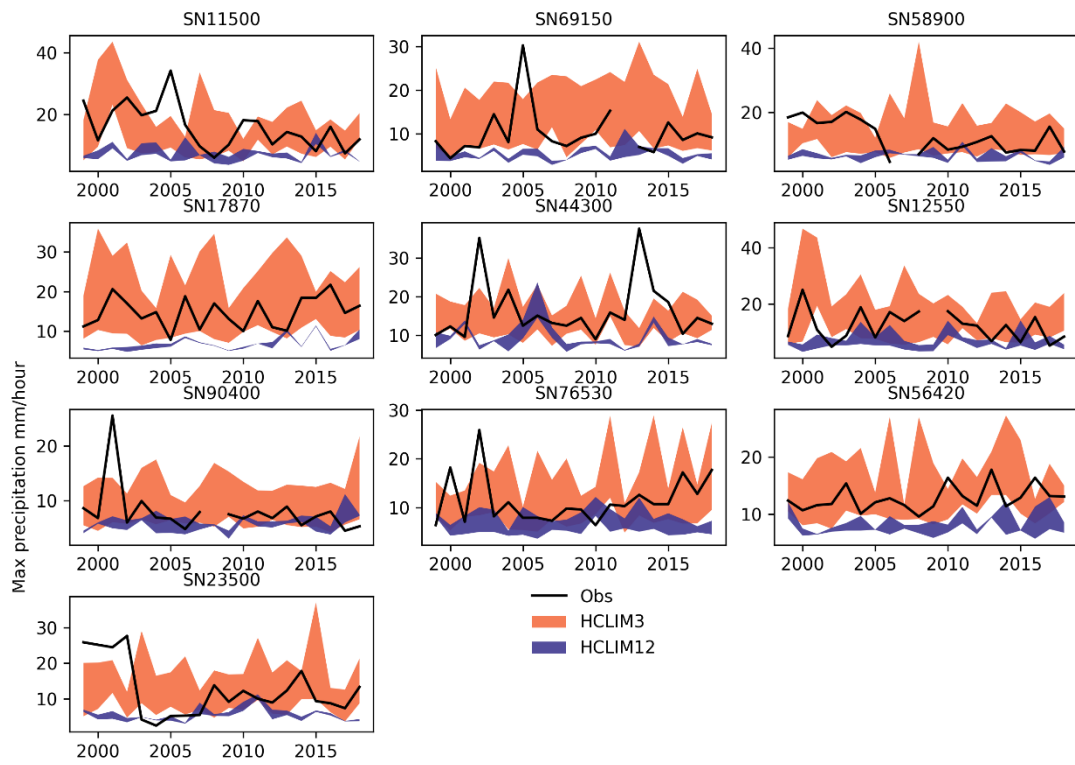

Figure S4. Time evolution of annual maximum hourly precipitation for each year from observation, HCLIM3 and HCLIM12 during 1999-2018 at 10 hourly rain-gauges.
